# Supplementary material for: Effects of a Seven Day Overload-Period of High-Intensity Training on Performance and Physiology of Competitive Cyclists
Source: PubMed Central journal article supplement (PMC4270748; doi:10.1371/journal.pone.0115308), 2014-12-18
Supplement: pone.0115308.s001.pdf [file pone.0115308.s001.pdf]

**CONTROL  
GROUP TEST 1**

| Name       | AGE         | WEIGHT      | COMP<br>WL  | TIME<br>FWL | PPO         | PPO/KG     | VT          | VT/KG      | VT HR      | (OBLA)      | LIP/KG     | LIP HR     | TT<br>PO    | TT<br>TIME   | TT<br>HR    | TT<br>RPM  | EC AT<br>220W | EFF         | ABS<br>VO2  | PEAK VE     |
|------------|-------------|-------------|-------------|-------------|-------------|------------|-------------|------------|------------|-------------|------------|------------|-------------|--------------|-------------|------------|---------------|-------------|-------------|-------------|
| GS         | 36          | 84          | 380         | 15          | 383         | 4.6        | 308         | 3.7        | 156        | 325         | 3.9        | 161        | 297         | 2161         | 159         | 83         | 71.1          | 20          | 5.6617      | 174         |
| BT         | 38          | 82          | 380         | 15          | 383         | 4.7        | 315         | 3.8        | 170        | 305         | 3.7        | 170        | 278         | 2356         | 164         | 88         | 76.5          | 22          | 5.093       | 192         |
| JS         | 41          | 78          | 300         | 75          | 313         | 4.0        | 260         | 3.3        | 165        | 270         | 3.5        | 169        | 261         | 2375         | 175         | 94         | 70.3          | 21          | 4.5628      | 160         |
| LO         | 28          | 78.3        | 420         | 0           | 420         | 5.4        | 320         | 4.1        | 150        | 355         | 4.5        | 160        | 347         | 2073         | 155         | 88         | 69.5          | 21          | 5.753       | 168         |
| MK         | 42          | 73          | 300         | 135         | 323         | 4.4        | 248         | 3.4        | 158        | 258         | 3.5        | 163        | 263         | 2369         | 170         | 100        | 69.0          | 20          | 4.323       | 160         |
| BC         | 25          | 63          | 340         | 17          | 343         | 5.4        | 300         | 4.8        | 181        | 282         | 4.5        | 174        | 305         | 2129         | 185         | 88         | 80.7          | 23          | 4.27        | 144.6       |
| MC         | 21          | 64          | 380         | 69          | 392         | 6.1        | 353         | 5.5        | 168        | 356         | 5.6        | 166        | 365         | 1959         | 175         | 88         | 74.8          | 22          | 4.95        | 150.9       |
| PC         | 48          | 73          | 300         | 188         | 331         | 4.5        | 273         | 3.7        | 161        | 285         | 3.9        | 164        | 280         | 2284         | 176         | 82         | 69.4          | 20          | 4.56        | 158.4       |
| SS         | 47          | 80          | 340         | 80          | 353         | 4.4        | 300         | 3.8        | 174        | 301         | 3.8        | 174        | 297         | 2281         | 175         | 84         | 70.7          | 21          | 4.36        | 144.8       |
| TD         | 37          | 91          | 260         | 142         | 284         | 3.1        | 238         | 2.6        | 155        | 247         | 2.7        | 158        | 228         | 2697         | 156         | 84         | 69.8          | 20          | 3.74        | 138.8       |
| <b>AVE</b> | <b>36.3</b> | <b>76.6</b> | <b>340</b>  | <b>74</b>   | <b>352</b>  | <b>4.7</b> | <b>292</b>  | <b>3.9</b> | <b>164</b> | <b>298</b>  | <b>4.0</b> | <b>166</b> | <b>292</b>  | <b>2268</b>  | <b>169</b>  | <b>88</b>  | <b>72</b>     | <b>21.0</b> | <b>4.73</b> | <b>159</b>  |
| <b>SD</b>  | <b>9.1</b>  | <b>8.7</b>  | <b>49.9</b> | <b>64.2</b> | <b>41.7</b> | <b>0.8</b> | <b>36.0</b> | <b>0.8</b> | <b>9.6</b> | <b>37.7</b> | <b>0.8</b> | <b>5.7</b> | <b>40.6</b> | <b>205.0</b> | <b>10.0</b> | <b>5.5</b> | <b>3.9</b>    | <b>1.1</b>  | <b>0.6</b>  | <b>15.9</b> |

**CONTROL  
GROUP TEST 2**

| NAME       | AGE         | WEIGHT      | COMP<br>WL  | TIME<br>FWL | PPO         | PPO/KG     | VT          | VT/KG      | VT HR       | (OBLA)      | LIP/KG     | LIP HR     | TT<br>PO    | TT<br>TIME   | TT<br>HR    | TT<br>RPM  | EC AT<br>220W | EFF         | ABS<br>VO2  | PEAK VE     |
|------------|-------------|-------------|-------------|-------------|-------------|------------|-------------|------------|-------------|-------------|------------|------------|-------------|--------------|-------------|------------|---------------|-------------|-------------|-------------|
| GS         | 36          | 84          | 380         | 30          | 385         | 4.6        | 290         | 3.5        | 151         | 323         | 3.8        | 160        | 303         | 2139         | 157         | 79         | 78            | 22.4        | 5.159       | 162         |
| BT         | 38          | 82          | 340         | 205         | 374         | 4.6        | 320         | 3.9        | 165         | 309         | 3.8        | 161        | 277         | 2389         | 157         | 79         | 78            | 22.4        | 5.357       | 175.4       |
| JS         | 41          | 78          | 300         | 30          | 305         | 3.9        | 253         | 3.2        | 156         | 288         | 3.7        | 166        | 232         | 2533         | 152         | 89         | 72            | 20.6        | 4.2416      | 150         |
| LO         | 28          | 78.3        | 380         | 90          | 395         | 5.0        | 305         | 3.9        | 144         | 340         | 4.3        | 154        | 304         | 2203         | 146         | 94         | 63            | 18.2        | 5.808       | 154.1       |
| MK         | 42          | 73          | 300         | 90          | 315         | 4.3        | 250         | 3.4        | 157         | 250         | 3.4        | 157        | 256         | 2403         | 167         | 100        | 72            | 20.7        | 4.323       | 166         |
| BC         | 25          | 63          | 300         | 120         | 320         | 5.1        | 293         | 4.7        | 183         | 249         | 4.0        | 173        | 286         | 2198         | 184         | 85         | 79            | 22.6        | 4.25        | 142.1       |
| MC         | 21          | 64          | 380         | 63          | 391         | 6.1        | 340         | 5.3        | 169         | 331         | 5.2        | 166        | 357         | 1981         | 173         | 88         | 78            | 23.2        | 5.08        | 167.8       |
| PC         | 48          | 73          | 300         | 75          | 313         | 4.3        | 273         | 3.7        | 161         | 256         | 3.5        | 156        | 275         | 2309         | 175         | 81         | 73            | 20.9        | 4.26        | 148.5       |
| SS         | 47          | 80          | 340         | 80          | 353         | 4.4        | 300         | 3.8        | 169         | 303         | 3.8        | 169        | 280         | 2343         | 171         | 84         | 71            | 20.7        | 4.45        | 140.5       |
| TD         | 37          | 91          | 260         | 205         | 294         | 3.2        | 233         | 2.6        | 162         | 230         | 2.5        | 162        | 226         | 2700         | 159         | 85         | 66            | 19.0        | 4.08        | 143.6       |
| <b>AVE</b> | <b>36.3</b> | <b>76.6</b> | <b>328</b>  | <b>99</b>   | <b>344</b>  | <b>4.6</b> | <b>286</b>  | <b>3.8</b> | <b>162</b>  | <b>288</b>  | <b>3.8</b> | <b>162</b> | <b>280</b>  | <b>2320</b>  | <b>164</b>  | <b>86</b>  | <b>73</b>     | <b>21.1</b> | <b>4.70</b> | <b>155</b>  |
| <b>SD</b>  | <b>9.1</b>  | <b>8.7</b>  | <b>42.4</b> | <b>62.2</b> | <b>39.2</b> | <b>0.8</b> | <b>33.4</b> | <b>0.8</b> | <b>10.8</b> | <b>39.2</b> | <b>0.7</b> | <b>6.1</b> | <b>37.9</b> | <b>205.0</b> | <b>11.8</b> | <b>6.7</b> | <b>5.4</b>    | <b>1.6</b>  | <b>0.6</b>  | <b>12.1</b> |

**CRASH SHORT TEST 1**

| NAME       | AGE         | WEIGHT      | COMP         |             | TIME         |            | PPO          | PPO/KG     | VT           | VT/KG        | VT HR      | (OBLA)       | LIP/KG       | LIP HR        | TT           |             | TT HR       | TT RPM      | EC AT 220W | EFF          | ABS VO2 | PEAK VE |
|------------|-------------|-------------|--------------|-------------|--------------|------------|--------------|------------|--------------|--------------|------------|--------------|--------------|---------------|--------------|-------------|-------------|-------------|------------|--------------|---------|---------|
|            |             |             | WL           | FWL         | TIME         | TT HR      |              |            |              |              |            |              |              |               |              |             |             |             |            |              |         |         |
| AS         | 38          | 68          | 300          | 191         | 332          | 4.9        | 260          | 3.8        | 153          | 236          | 3.5        | 147          | 254          | 2383          | 157          | 88          | 69          | 19.9        | 4.479      | 152.3        |         |         |
| BC         | 25          | 62          | 340          | 21          | 344          | 5.5        | 280          | 4.5        | 170          | 284          | 4.6        | 171          | 312          | 2087          | 185          | 93          | 72.2        | 21          | 4.884      | 140.5        |         |         |
| CS         | 39          | 79          | 300          | 219         | 337          | 4.3        | 260          | 3.3        | 151          | 200          | 2.5        | 129          | 278          | 2327          | 170          | 87          | 63.2        | 18          | 5.22       | 193.2        |         |         |
| JL         | 17          | 67          | 300          | 109         | 318          | 4.7        | 263          | 3.9        | 174          | 274          | 4.1        | 178          | 231          | 2548          | 174          | 84          | 70.1        | 20          | 4.371      | 133.5        |         |         |
| MT         | 35          | 72          | 340          | 0           | 340          | 4.7        | 255          | 3.5        | 151          | 297          | 4.1        | 165          | 257          | 2374          | 157          | 98          | 58.9        | 18          | 4.646      | 192.9        |         |         |
| PC         | 48          | 71          | 300          | 94          | 316          | 4.4        | 258          | 3.6        | 167          | 277          | 3.9        | 172          | 265          | 2342          | 176          | 88          | 72.2        | 21          | 4.467      | 164.4        |         |         |
| RH         | 23          | 77          | 300          | 89          | 315          | 4.1        | 263          | 3.4        | 153          | 274          | 3.6        | 156          | 267          | 2364          | 168          | 89          | 68.2        | 20          | 4.685      | 163.6        |         |         |
| RK         | 35          | 82          | 380          | 0           | 380          | 4.6        | 305          | 3.7        | 143          | 270          | 3.3        | 132          | 300          | 2307          | 158          | 104         | 75.7        | 22          | 5.219      | 185.1        |         |         |
| TB         | 17          | 69          | 340          | 147         | 365          | 5.3        | 300          | 4.3        | 177          | 284          | 4.1        | 172          | 298          | 2200          | 176          | 83          | 76.9        | 22          | 4.686      | 176.9        |         |         |
| <b>AVE</b> | <b>30.8</b> | <b>71.9</b> | <b>322.2</b> | <b>96.7</b> | <b>338.3</b> | <b>4.7</b> | <b>271.6</b> | <b>3.8</b> | <b>159.9</b> | <b>266.2</b> | <b>3.7</b> | <b>158.0</b> | <b>273.6</b> | <b>2325.8</b> | <b>169.0</b> | <b>90.4</b> | <b>69.6</b> | <b>20.3</b> | <b>4.7</b> | <b>166.9</b> |         |         |
| <b>SD</b>  | <b>10.8</b> | <b>6.4</b>  | <b>29.1</b>  | <b>79.9</b> | <b>22.3</b>  | <b>0.5</b> | <b>18.9</b>  | <b>0.4</b> | <b>12.2</b>  | <b>29.9</b>  | <b>0.6</b> | <b>18.2</b>  | <b>25.9</b>  | <b>127.4</b>  | <b>9.9</b>   | <b>6.8</b>  | <b>5.7</b>  | <b>1.5</b>  | <b>0.3</b> | <b>21.9</b>  |         |         |

**CRASH SHORT TEST 2**

| NAME       | AGE         | WEIGHT      | COMP         |              | TIME         |            | PPO          | PPO/KG     | VT           | VT/KG        | VT HR      | (OBLA)       | LIP/KG       | LIP HR        | TT           |             | TT HR       | TT RPM      | EC AT 220W | EFF          | ABS VO2 | PEAK VE |
|------------|-------------|-------------|--------------|--------------|--------------|------------|--------------|------------|--------------|--------------|------------|--------------|--------------|---------------|--------------|-------------|-------------|-------------|------------|--------------|---------|---------|
|            |             |             | WL           | FWL          | TIME         | TT HR      |              |            |              |              |            |              |              |               |              |             |             |             |            |              |         |         |
| AS         | 38          | 68          | 340          | 20           | 343          | 5.0        | 265          | 3.9        | 153          | 234          | 3.4        | 143          | 267          | 2318          | 156          | 87          | 70.2        | 21          | 4.542      | 154.9        |         |         |
| BC         | 25          | 62          | 340          | 116          | 359          | 5.8        | 295          | 4.8        | 173          | 272          | 4.4        | 168          | 319          | 2067          | 182          | 88          | 75.0        | 22          | 4.708      | 167.3        |         |         |
| CS         | 39          | 79          | 340          | 44           | 347          | 4.4        | 260          | 3.3        | 142          | 248          | 3.1        | 136          | 299          | 2244          | 164          | 85          | 68.0        | 20          | 4.887      | 201.1        |         |         |
| JL         | 17          | 67          | 300          | 180          | 330          | 4.9        | 265          | 4.0        | 179          | 266          | 4.0        | 179          | 267          | 2306          | 182          | 84          | 74.2        | 21          | 4.166      | 149.5        |         |         |
| MT         | 35          | 72          | 300          | 178          | 330          | 4.6        | 263          | 3.7        | 152          | 273          | 3.8        | 155          | 262          | 2368          | 156          | 94          | 72.1        | 21          | 4.607      | 179.5        |         |         |
| PC         | 48          | 71          | 300          | 105          | 318          | 4.5        | 260          | 3.7        | 156          | 271          | 3.8        | 168          | 270          | 2318          | 172          | 88          | 71.0        | 21          | 4.376      | 149.3        |         |         |
| RH         | 23          | 77          | 300          | 163          | 327          | 4.2        | 260          | 3.4        | 151          | 260          | 3.4        | 152          | 267          | 2364          | 168          | 89          | 69.5        | 20          | 4.815      | 170.9        |         |         |
| RK         | 35          | 82          | 380          | 46           | 388          | 4.7        | 305          | 3.7        | 142          | 281          | 3.4        | 134          | 319          | 2229          | 156          | 94          | 75.5        | 22          | 5.335      | 204.3        |         |         |
| TB         | 17          | 69          | 340          | 81           | 354          | 5.1        | 300          | 4.3        | 175          | 280          | 4.1        | 169          | 288          | 2238          | 175          | 79          | 81.3        | 23          | 4.303      | 154.8        |         |         |
| <b>AVE</b> | <b>30.8</b> | <b>71.9</b> | <b>326.7</b> | <b>103.7</b> | <b>343.9</b> | <b>4.8</b> | <b>274.8</b> | <b>3.9</b> | <b>158.1</b> | <b>265.0</b> | <b>3.7</b> | <b>156.0</b> | <b>284.2</b> | <b>2272.4</b> | <b>167.9</b> | <b>87.6</b> | <b>73.0</b> | <b>21.1</b> | <b>4.6</b> | <b>170.2</b> |         |         |
| <b>SD</b>  | <b>10.8</b> | <b>6.4</b>  | <b>28.3</b>  | <b>60.6</b>  | <b>21.3</b>  | <b>0.5</b> | <b>19.2</b>  | <b>0.5</b> | <b>14.1</b>  | <b>15.4</b>  | <b>0.4</b> | <b>16.0</b>  | <b>23.0</b>  | <b>92.8</b>   | <b>10.6</b>  | <b>4.7</b>  | <b>4.1</b>  | <b>1.1</b>  | <b>0.4</b> | <b>21.1</b>  |         |         |

**CRASH SHORT TEST 3**

| NAME       | AGE         | WEIGHT      | COMP         |             | TIME         |            | PPO          | PPO/KG     | VT           | VT/KG        | VT HR      | (OBLA)       | LIP/KG       | LIP HR        | TT           |             | EC AT       | EFF         | ABS        | PEAK VE      |
|------------|-------------|-------------|--------------|-------------|--------------|------------|--------------|------------|--------------|--------------|------------|--------------|--------------|---------------|--------------|-------------|-------------|-------------|------------|--------------|
|            |             |             | WL           | FWL         | TT PO        | TIME       |              |            |              |              |            |              |              |               | TT HR        | RPM         |             |             |            |              |
| AS         | 38          | 68          | 340          | 30          | 345          | 5.1        | 260          | 3.8        | 151          | 264          | 3.9        | 152          | 267          | 2295          | 155          | 87          | 71.7        | 21          | 4.796      | 166.6        |
| BC         | 25          | 62          | 340          | 52          | 349          | 5.6        | 290          | 4.7        | 172          | 279          | 4.5        | 168          | 315          | 2079          | 187          | 84          | 74.8        | 21          | 4.526      | 150.4        |
| CS         | 39          | 79          | 300          | 191         | 332          | 4.2        | 260          | 3.3        |              | 255          | 3.2        |              | 265          | 2369          |              | 80          | 71.3        | 21          | 4.732      | 204.3        |
| JL         | 17          | 67          | 340          | 30          | 345          | 5.1        | 263          | 3.9        | 168          | 273          | 4.1        | 172          | 282          | 2239          | 179          | 82          | 74.8        | 22          | 4.442      | 155.8        |
| MT         | 35          | 72          | 300          | 225         | 338          | 4.7        | 263          | 3.7        | 152          | 296          | 4.1        | 162          | 258          | 2376          | 156          | 90          | 76.8        | 22          | 4.797      | 177.1        |
| PC         | 48          | 71          | 300          | 148         | 325          | 4.6        | 260          | 3.7        | 164          | 267          | 3.8        | 166          | 256          | 2368          | 178          | 81          | 75.1        | 22          | 4.221      | 162.8        |
| RH         | 23          | 77          | 340          | 1           | 340          | 4.4        | 263          | 3.4        |              | 263          | 3.4        |              | 267          | 2372          | 156          | 87          | 68.7        | 20          | 5.195      | 188.2        |
| RK         | 35          | 82          | 380          | 52          | 389          | 4.7        | 300          | 3.7        | 143          | 284          | 3.5        | 138          | 310          | 2258          | 157          | 90          | 77.2        | 23          | 5.507      | 210.7        |
| TB         | 17          | 69          | 340          | 90          | 355          | 5.1        | 303          | 4.4        | 177          | 277          | 4.0        | 167          | 283          | 2255          | 175          | 82          | 79.3        | 23          | 4.417      | 162.7        |
| <b>AVE</b> | <b>30.8</b> | <b>71.9</b> | <b>331.1</b> | <b>91.0</b> | <b>346.3</b> | <b>4.8</b> | <b>273.6</b> | <b>3.8</b> | <b>161.0</b> | <b>273.1</b> | <b>3.8</b> | <b>160.7</b> | <b>278.1</b> | <b>2290.1</b> | <b>167.9</b> | <b>84.8</b> | <b>74.4</b> | <b>21.4</b> | <b>4.7</b> | <b>175.4</b> |
| <b>SD</b>  | <b>10.8</b> | <b>6.4</b>  | <b>26.7</b>  | <b>78.9</b> | <b>18.3</b>  | <b>0.4</b> | <b>18.4</b>  | <b>0.4</b> | <b>12.5</b>  | <b>12.5</b>  | <b>0.4</b> | <b>11.8</b>  | <b>21.6</b>  | <b>97.4</b>   | <b>13.1</b>  | <b>3.8</b>  | <b>3.3</b>  | <b>1.0</b>  | <b>0.4</b> | <b>21.4</b>  |

**CRASH SHORT TEST 4**

| NAME       | AGE         | WEIGHT      | COMP         |              | TIME         |            | PPO          | PPO/KG     | VT           | VT/KG        | VT HR      | (OBLA)       | LIP/KG       | LIP HR        | TT           |             | EC AT       | EFF         | ABS        | PEAK VE      |
|------------|-------------|-------------|--------------|--------------|--------------|------------|--------------|------------|--------------|--------------|------------|--------------|--------------|---------------|--------------|-------------|-------------|-------------|------------|--------------|
|            |             |             | WL           | FWL          | TT PO        | TIME       |              |            |              |              |            |              |              |               | TT HR        | RPM         |             |             |            |              |
| AS         | 38          | 68          | 340          | 100          | 357          | 5.2        | 270          | 4.0        | 151          | 244          | 3.6        | 143          | 272          | 2275          | 154          | 84          | 74.0        | 21          | 4.534      | 170.9        |
| BC         | 25          | 62          | 340          | 80           | 353          | 5.7        | 290          | 4.7        | 171          | 295          | 4.8        | 172          | 322          | 2055          | 187          | 82          | 74.8        | 22          | 4.609      | 153.4        |
| CS         | 39          | 79          | 300          | 215          | 336          | 4.3        | 260          | 3.3        | 143          | 221          | 2.8        | 137          | 280          | 2323          | 165          | 79          | 67.4        | 19          | 4.774      | 202.6        |
| JL         | 17          | 67          | 340          | 61           | 350          | 5.2        | 273          | 4.1        | 171          | 278          | 4.1        | 172          | 281          | 2242          | 179          | 80          | 76.4        | 22          | 4.407      | 152.3        |
| MT         | 35          | 72          | 340          | 30           | 345          | 4.8        | 260          | 3.6        | 153          | 296          | 4.1        | 164          | 272          | 2314          | 159          | 95          | 70.0        | 20          | 4.844      | 182.8        |
| PC         | 48          | 71          | 300          | 200          | 333          | 4.7        | 283          | 4.0        | 161          | 283          | 4.0        | 161          | 291          | 2225          | 178          | 81          | 75.5        | 22          | 4.721      | 159.2        |
| RH         | 23          | 77          | 340          | 11           | 342          | 4.4        | 260          | 3.4        | 3.72         | 265          | 3.4        | 157          | 283          | 2278          | 165          | 77          | 71.8        | 21          | 5.067      | 174.7        |
| RK         | 35          | 82          | 380          | 81           | 394          | 4.8        | 300          | 3.7        | 143          | 306          | 3.7        | 145          | 313          | 2223          | 153          | 90          | 78.3        | 23          | 5.69       | 205.2        |
| TB         | 17          | 69          | 340          | 184          | 371          | 5.4        | 308          | 4.5        | 173          | 293          | 4.2        | 169          | 308          | 2154          | 177          | 85          | 77.6        | 22          | 4.545      | 174.4        |
| <b>AVE</b> | <b>30.8</b> | <b>71.9</b> | <b>335.6</b> | <b>106.9</b> | <b>353.4</b> | <b>4.9</b> | <b>278.2</b> | <b>3.9</b> | <b>141.1</b> | <b>275.7</b> | <b>3.9</b> | <b>157.8</b> | <b>291.3</b> | <b>2232.1</b> | <b>168.6</b> | <b>83.7</b> | <b>74.0</b> | <b>21.3</b> | <b>4.8</b> | <b>175.1</b> |
| <b>SD</b>  | <b>10.8</b> | <b>6.4</b>  | <b>24.0</b>  | <b>75.0</b>  | <b>18.9</b>  | <b>0.5</b> | <b>18.1</b>  | <b>0.5</b> | <b>52.8</b>  | <b>27.8</b>  | <b>0.6</b> | <b>13.2</b>  | <b>18.5</b>  | <b>84.1</b>   | <b>12.1</b>  | <b>5.7</b>  | <b>3.6</b>  | <b>1.0</b>  | <b>0.4</b> | <b>19.3</b>  |

**CRASH LONG TEST 1**

| NAME       | AGE         | WEIGHT      | COMP         |             | TIME         |            | PPO          | PPO/KG     | VT           | VT/KG        | VT HR      | (OBLA)       | LIP/KG       | LIP HR        | TT           |             | TT HR       | RPM         | EC AT      | 220W         | EFF | ABS | VO2 | PEAK VE |
|------------|-------------|-------------|--------------|-------------|--------------|------------|--------------|------------|--------------|--------------|------------|--------------|--------------|---------------|--------------|-------------|-------------|-------------|------------|--------------|-----|-----|-----|---------|
|            |             |             | WL           | FWL         | TT PO        | TIME       |              |            |              |              |            |              |              |               |              |             |             |             |            |              |     |     |     |         |
| BR         | 16          | 78.7        | 340          | 165         | 368          | 4.7        | 320          | 4.1        | 171          | 302          | 3.8        | 165          | 298          | 2246          | 174          | 103         | 73          | 20.8        | 4.664      | 162          |     |     |     |         |
| CP         | 45          | 70          | 300          | 60          | 310          | 4.4        | 248          | 3.5        | 165          | 245          | 3.5        | 165          | 251          | 2421          | 171          | 82          | 75          | 21.2        | 3.905      | 175          |     |     |     |         |
| GH         | 37          | 72.8        | 340          | 165         | 368          | 5.0        | 300          | 4.1        | 146          | 329          | 4.5        | 157          | 289          | 2263          | 159          | 99          | 67          | 19.5        | 5.4109     | 180          |     |     |     |         |
| JK         | 42          | 71.7        | 340          | 75          | 353          | 4.9        | 263          | 3.7        | 131          | 331          | 4.6        | 128          | 298          | 2235          | 154          | 93          | 72          | 20.9        | 4.6145     | 179          |     |     |     |         |
| KW         | 44          | 68          | 300          | 45          | 308          | 4.5        | 253          | 3.7        | 156          | 270          | 4.0        | 164          | 254          | 2387          | 164          | 90          | 77          | 22.0        | 4.0623     | 175          |     |     |     |         |
| NIGE       | 42          | 86          | 340          | 90          | 355          | 4.1        | 300          | 3.5        | 162          | 331          | 3.8        | 171          | 297          | 2181          | 172          | 90          | 69          | 19.8        | 5.005      | 185          |     |     |     |         |
| NIK        | 30          | 83          | 300          | 30          | 305          | 3.7        | 250          | 3.0        | 165          | 254          | 3.1        | 168          | 235          | 2670          | 171          | 114         | 67          | 19.6        | 5.038      | 165          |     |     |     |         |
| VC         | 33          | 75          | 300          | 0           | 300          | 4.0        | 255          | 3.4        | 177          | 249          | 3.3        | 175          | 248          | 2440          | 178          | 92          | 67          | 19.1        | 4.367      | 165          |     |     |     |         |
| WB         | 27          | 74.9        | 340          | 105         | 358          | 4.8        | 308          | 4.1        | 151          | 327          | 0.0        | 156          | 315          | 2153          | 159          | 89          | 70          | 20.8        | 4.994      | 157          |     |     |     |         |
| WG         | 16          | 67.8        | 300          | 150         | 325          | 4.8        | 275          | 4.1        | 170          | 278          | 4.1        | 170          | 274          | 2337          | 173          | 93          | 71          | 20.2        | 4.389      | 170          |     |     |     |         |
| <b>AVE</b> | <b>33.2</b> | <b>74.8</b> | <b>320.0</b> | <b>88.5</b> | <b>334.8</b> | <b>4.5</b> | <b>277.2</b> | <b>3.7</b> | <b>159.4</b> | <b>291.6</b> | <b>3.5</b> | <b>161.9</b> | <b>275.9</b> | <b>2333.3</b> | <b>167.5</b> | <b>94.5</b> | <b>70.8</b> | <b>20.4</b> | <b>4.6</b> | <b>171.3</b> |     |     |     |         |
| <b>SD</b>  | <b>10.9</b> | <b>6.1</b>  | <b>21.1</b>  | <b>57.6</b> | <b>27.8</b>  | <b>0.4</b> | <b>27.3</b>  | <b>0.4</b> | <b>13.7</b>  | <b>36.4</b>  | <b>1.3</b> | <b>13.3</b>  | <b>27.2</b>  | <b>153.9</b>  | <b>7.9</b>   | <b>8.9</b>  | <b>3.4</b>  | <b>0.9</b>  | <b>0.5</b> | <b>9.0</b>   |     |     |     |         |

**CRASH LONGTEST 2**

| NAME       | AGE         | WEIGHT      | COMP         |             | TIME         |            | PPO          | PPO/KG     | VT           | VT/KG        | VT HR      | (OBLA)       | LIP/KG       | LIP HR        | TT           |             | TT HR       | RPM         | EC AT      | 220W         | EFF | ABS | VO2 | PEAK VE |
|------------|-------------|-------------|--------------|-------------|--------------|------------|--------------|------------|--------------|--------------|------------|--------------|--------------|---------------|--------------|-------------|-------------|-------------|------------|--------------|-----|-----|-----|---------|
|            |             |             | WL           | FWL         | TT PO        | TIME       |              |            |              |              |            |              |              |               |              |             |             |             |            |              |     |     |     |         |
| BR         | 16          | 78.7        | 340          | 15          | 343          | 4.4        | 303          | 3.9        | 164          | 321          | 4.1        | 169          | 261          | 2427          | 158          | 96          | 76          | 21.8        | 5.181      | 142          |     |     |     |         |
| CP         | 45          | 70          | 300          | 105         | 318          | 4.5        | 263          | 3.8        | 170          | 270          | 3.9        | 172          | 260          | 2366          | 172          | 83          | 74          | 21.0        | 4.268      | 177          |     |     |     |         |
| GH         | 37          | 72.8        | 340          | 225         | 378          | 5.2        | 310          | 4.3        | 144          | 318          | 4.4        | 147          | 300          | 2189          | 158          | 97          | 78          | 22.5        | 5.1634     | 172          |     |     |     |         |
| JK         | 42          | 71.7        | 340          | 105         | 358          | 5.0        | 278          | 3.9        | 126          | 328          | 4.6        | 145          | 311          | 2178          | 150          | 92          | 75          | 21.7        | 4.818      | 197          |     |     |     |         |
| KW         | 44          | 68          | 300          | 15          | 303          | 4.4        | 258          | 3.8        | 169          | 272          | 4.0        | 162          | 260          | 2360          | 165          | 81          | 76          | 21.8        | 4.3714     | 174          |     |     |     |         |
| NIGE       | 42          | 86          | 340          | 105         | 358          | 4.2        | 300          | 3.5        | 159          | 356          | 4.1        | 173          | 293          | 2202          | 162          | 92          | 72          | 20.9        | 4.631      | 185          |     |     |     |         |
| NIK        | 30          | 83          | 300          | 90          | 315          | 3.8        | 260          | 3.1        | 168          | 299          | 3.6        | 177          | 255          | 2497          | 177          | 92          | 68          | 19.9        | 4.708      | 155          |     |     |     |         |
| VC         | 33          | 75          | 300          | 15          | 303          | 4.0        | 260          | 3.5        | 176          | 247          | 3.3        | 172          | 244          | 2449          | 178          | 90          | 64          | 18.5        | 4.367      | 172          |     |     |     |         |
| WB         | 27          | 74.9        | 340          | 205         | 374          | 5.0        | 300          | 4.0        | 148          | 332          | 4.4        | 159          | 323          | 2126          | 165          | 87          | 72          | 21.2        | 5.093      | 173          |     |     |     |         |
| WG         | 16          | 67.8        | 340          | 0           | 340          | 5.0        | 285          | 4.2        | 163          | 291          | 4.3        | 165          | 279          | 2271          | 167          | 95          | 77          | 21.8        | 4.554      | 170          |     |     |     |         |
| <b>AVE</b> | <b>33.2</b> | <b>74.8</b> | <b>324.0</b> | <b>88.0</b> | <b>338.7</b> | <b>4.6</b> | <b>281.7</b> | <b>3.8</b> | <b>158.7</b> | <b>303.4</b> | <b>4.1</b> | <b>164.1</b> | <b>278.6</b> | <b>2306.5</b> | <b>165.2</b> | <b>90.5</b> | <b>73.2</b> | <b>21.1</b> | <b>4.7</b> | <b>171.7</b> |     |     |     |         |
| <b>SD</b>  | <b>10.9</b> | <b>6.1</b>  | <b>20.7</b>  | <b>79.6</b> | <b>28.1</b>  | <b>0.5</b> | <b>20.6</b>  | <b>0.3</b> | <b>15.2</b>  | <b>33.6</b>  | <b>0.4</b> | <b>11.0</b>  | <b>26.8</b>  | <b>130.2</b>  | <b>8.8</b>   | <b>5.4</b>  | <b>4.3</b>  | <b>1.2</b>  | <b>0.3</b> | <b>15.0</b>  |     |     |     |         |

**CRASH LONG TEST 3**

| NAME       | AGE         | WEIGHT      | COMP         |             | TIME         |            | PPO          | PPO/KG     | VT           | VT/KG        | VT HR      | (OBLA)       | LIP/KG       | LIP HR        | TT           |             | TT HR       | RPM         | EC AT      | 220W         | EFF | ABS | V02 | PEAK VE |
|------------|-------------|-------------|--------------|-------------|--------------|------------|--------------|------------|--------------|--------------|------------|--------------|--------------|---------------|--------------|-------------|-------------|-------------|------------|--------------|-----|-----|-----|---------|
|            |             |             | WL           | FWL         | TT PO        | TIME       |              |            |              |              |            |              |              |               |              |             |             |             |            |              |     |     |     |         |
| BR         | 16          | 78.7        | 340          | 225         | 378          | 4.8        | 315          | 4.0        | 166          | 322          | 4.1        | 170          | 295          | 2265          | 171          | 98          | 75          | 21.4        | 4.95       | 178          |     |     |     |         |
| CP         | 45          | 71          | 340          | 30          | 345          | 4.9        | 263          | 3.7        | 164          | 281          | 4.0        | 168          | 292          | 2214          | 173          | 85          | 76          | 21.7        | 4.5441     | 176          |     |     |     |         |
| GH         | 37          | 71.8        | 380          | 120         | 400          | 5.6        | 310          | 4.3        | 147          | 325          | 4.5        | 154          | 324          | 2087          | 165          | 90          | 76          | 22.2        | 5.522      | 183          |     |     |     |         |
| JK         | 42          | 72.9        | 380          | 15          | 383          | 5.2        | 303          | 4.2        | 131          | 323          | 4.4        | 140          | 295          | 2261          | 148          | 96          | 72          | 21.0        | 4.9247     | 198          |     |     |     |         |
| KW         | 44          | 68          | 300          | 30          | 305          | 4.5        | 260          | 3.8        | 161          | 272          | 4.0        | 166          | 248          | 2409          | 167          | 86          | 74          | 21.1        | 4.1503     | 189          |     |     |     |         |
| NIGE       | 42          | 86.4        | 340          | 180         | 370          | 4.3        | 313          | 3.6        | 163          | 325          | 3.8        | 168          | 295          | 2188          | 176          | 88          | 72          | 20.9        | 5.214      | 193          |     |     |     |         |
| NIK        | 30          | 82          | 340          | 0           | 340          | 4.1        | 285          | 3.5        | 168          | 296          | 3.6        | 170          | 276          | 2356          | 174          | 86          | 70          | 20.3        | 4.708      | 157          |     |     |     |         |
| VC         | 33          | 75.2        | 300          | 120         | 320          | 4.3        | 268          | 3.6        | 183          | 257          | 3.4        | 179          | 264          | 2365          | 187          | 86          | 70          | 20.1        | 4.389      | 182          |     |     |     |         |
| WB         | 27          | 74.9        | 380          | 75          | 393          | 5.2        | 350          | 4.7        | 159          | 362          | 4.8        | 162          | 338          | 2067          | 164          | 86          | 74          | 21.9        | 5.379      | 173          |     |     |     |         |
| WG         | 16          | 67.8        | 300          | 145         | 324          | 4.8        | 260          | 3.8        | 167          | 283          | 4.2        | 170          | 257          | 2392          | 169          | 92          | 83          | 23.5        | 4.202      | 168          |     |     |     |         |
| <b>AVE</b> | <b>33.2</b> | <b>74.9</b> | <b>340.0</b> | <b>94.0</b> | <b>355.7</b> | <b>4.8</b> | <b>292.7</b> | <b>3.9</b> | <b>160.9</b> | <b>304.6</b> | <b>4.1</b> | <b>164.7</b> | <b>288.4</b> | <b>2260.4</b> | <b>169.4</b> | <b>89.3</b> | <b>74.2</b> | <b>21.4</b> | <b>4.8</b> | <b>179.7</b> |     |     |     |         |
| <b>SD</b>  | <b>10.9</b> | <b>6.0</b>  | <b>32.7</b>  | <b>76.1</b> | <b>33.2</b>  | <b>0.5</b> | <b>30.3</b>  | <b>0.4</b> | <b>13.8</b>  | <b>32.0</b>  | <b>0.4</b> | <b>10.8</b>  | <b>28.4</b>  | <b>122.2</b>  | <b>10.0</b>  | <b>4.6</b>  | <b>3.8</b>  | <b>1.0</b>  | <b>0.5</b> | <b>12.1</b>  |     |     |     |         |

**CRASH LONG TEST 4**

| NAME       | AGE         | WEIGHT      | COMP         |             | TIME         |            | PPO          | PPO/KG     | VT           | VT/KG        | VT HR      | (OBLA)       | LIP/KG       | LIP HR        | TT           |             | TT HR       | RPM         | EC AT      | 220W         | EFF | ABS | V02 | PEAK VE |
|------------|-------------|-------------|--------------|-------------|--------------|------------|--------------|------------|--------------|--------------|------------|--------------|--------------|---------------|--------------|-------------|-------------|-------------|------------|--------------|-----|-----|-----|---------|
|            |             |             | WL           | FWL         | TT PO        | TIME       |              |            |              |              |            |              |              |               |              |             |             |             |            |              |     |     |     |         |
| BR         | 16          | 78.9        | 380          | 45          | 388          | 4.9        | 325          | 4.1        | 167          | 302          | 3.8        | 171          | 316          | 2144          | 175          | 98          | 77          | 22.0        | 5.368      | 180          |     |     |     |         |
| CP         | 45          | 71.4        | 340          | 15          | 343          | 4.8        | 283          | 4.0        | 163          | 275          | 3.9        | 163          | 290          | 2203          | 168          | 83          | 79          | 23.0        | 4.2185     | 179          |     |     |     |         |
| GH         | 37          | 71.5        | 380          | 75          | 393          | 5.5        | 325          | 4.5        | 150          | 334          | 4.7        | 155          | 332          | 2069          | 165          | 92          | 80          | 23.1        | 5.291      | 171          |     |     |     |         |
| JK         | 42          | 72          | 380          | 15          | 383          | 5.3        | 320          | 4.4        | 139          | 327          | 4.5        | 142          | 307          | 2190          | 150          | 86          | 72          | 20.9        | 5.3284     | 191          |     |     |     |         |
| KW         | 44          | 68          | 300          | 120         | 320          | 4.7        | 255          | 3.8        | 154          | 266          | 3.9        | 156          | 263          | 2334          | 164          | 84          | 78          | 22.1        | 4.3593     | 192          |     |     |     |         |
| NIGE       | 42          | 87          | 380          | 15          | 383          | 4.4        | 308          | 3.5        | 168          | 333          | 3.8        | 176          | 285          | 2222          | 172          | 83          | 71          | 20.7        | 5.137      | 196          |     |     |     |         |
| NIK        | 30          | 82.7        | 340          | 15          | 343          | 4.1        | 283          | 3.4        | 166          | 312          | 3.8        | 174          | 274          | 2370          | 175          | 88          | 73          | 21.6        | 4.389      | 160          |     |     |     |         |
| VC         | 33          | 74          | 300          | 210         | 335          | 4.5        | 263          | 3.6        | 174          | 255          | 3.4        | 172          | 266          | 2344          | 183          | 83          | 69          | 19.8        | 4.62       | 199          |     |     |     |         |
| WB         | 27          | 76          | 380          | 75          | 393          | 5.2        | 350          | 4.6        | 159          | 362          | 4.8        | 162          | 330          | 2099          | 157          | 81          | 76          | 22.6        | 5.137      | 175          |     |     |     |         |
| WG         | 16          | 68          | 340          | 30          | 345          | 5.1        | 300          | 4.4        | 169          | 297          | 4.4        | 169          | 296          | 2188          | 171          | 91          | 78          | 22.4        | 4.642      | 157          |     |     |     |         |
| <b>AVE</b> | <b>33.2</b> | <b>75.0</b> | <b>352.0</b> | <b>61.5</b> | <b>362.3</b> | <b>4.9</b> | <b>301.2</b> | <b>4.0</b> | <b>160.9</b> | <b>306.3</b> | <b>4.1</b> | <b>164.0</b> | <b>295.9</b> | <b>2216.3</b> | <b>168.0</b> | <b>86.9</b> | <b>75.3</b> | <b>21.8</b> | <b>4.8</b> | <b>180.0</b> |     |     |     |         |
| <b>SD</b>  | <b>10.9</b> | <b>6.3</b>  | <b>32.9</b>  | <b>63.0</b> | <b>27.7</b>  | <b>0.4</b> | <b>30.1</b>  | <b>0.5</b> | <b>10.6</b>  | <b>34.0</b>  | <b>0.4</b> | <b>10.6</b>  | <b>25.0</b>  | <b>103.4</b>  | <b>9.5</b>   | <b>5.3</b>  | <b>3.9</b>  | <b>1.1</b>  | <b>0.4</b> | <b>14.6</b>  |     |     |     |         |
